# Supplementary material
Source: Research Square preprint supplement (doi:10.21203/rs.3.rs-8777421/v1)
Supplement: Supplementary file 1 [file 910751bd7e94610e296e8aec.docx]

| **Variables (变量)** | **β** | **S.E** | **Z** | **P** | **OR (95%CI)** |
| --- | --- | --- | --- | --- | --- |
| SPAP-rest | 0.12 | 0.04 | 2.87 | **0.004** | 1.13 (1.04 ~ 1.23) |
| TV s′-rest | 50.58 | 19.04 | 2.66 | **0.008** | 9.25e21 (5.79e5 ~ 1.48e38) |
| TAPSE/SPAP-rest | -7.37 | 3.27 | -2.25 | **0.024** | 0.00 (0.00 ~ 0.38) |
| IVC-peak | 0.24 | 0.11 | 2.22 | **0.026** | 1.27 (1.03 ~ 1.56) |
| mPAP-peak | 0.21 | 0.07 | 2.87 | **0.004** | 1.23 (1.07 ~ 1.42) |
| PVR-peak | 5.27 | 1.94 | 2.71 | **0.007** | 194.78 (4.32 ~ 8776.40) |
| SPAP-peak | 0.1 | 0.04 | 2.34 | **0.019** | 1.10 (1.02 ~ 1.20) |
| TR -peak | 3.44 | 1.21 | 2.85 | **0.004** | 31.24 (2.93 ~ 332.70) |
| mPAP/CO slope | 0.56 | 0.25 | 2.28 | **0.023** | 1.76 (1.08 ~ 2.86) |
| ΔPVR | 0.06 | 0.02 | 2.85 | **0.004** | 1.06 (1.02 ~ 1.11) |
| ΔTV s′ | -0.23 | 0.1 | -2.4 | **0.016** | 0.79 (0.65 ~ 0.96) |

Supplemental Table 1. Significant univariable predictors (P < 0.05) entered into the multivariable model.


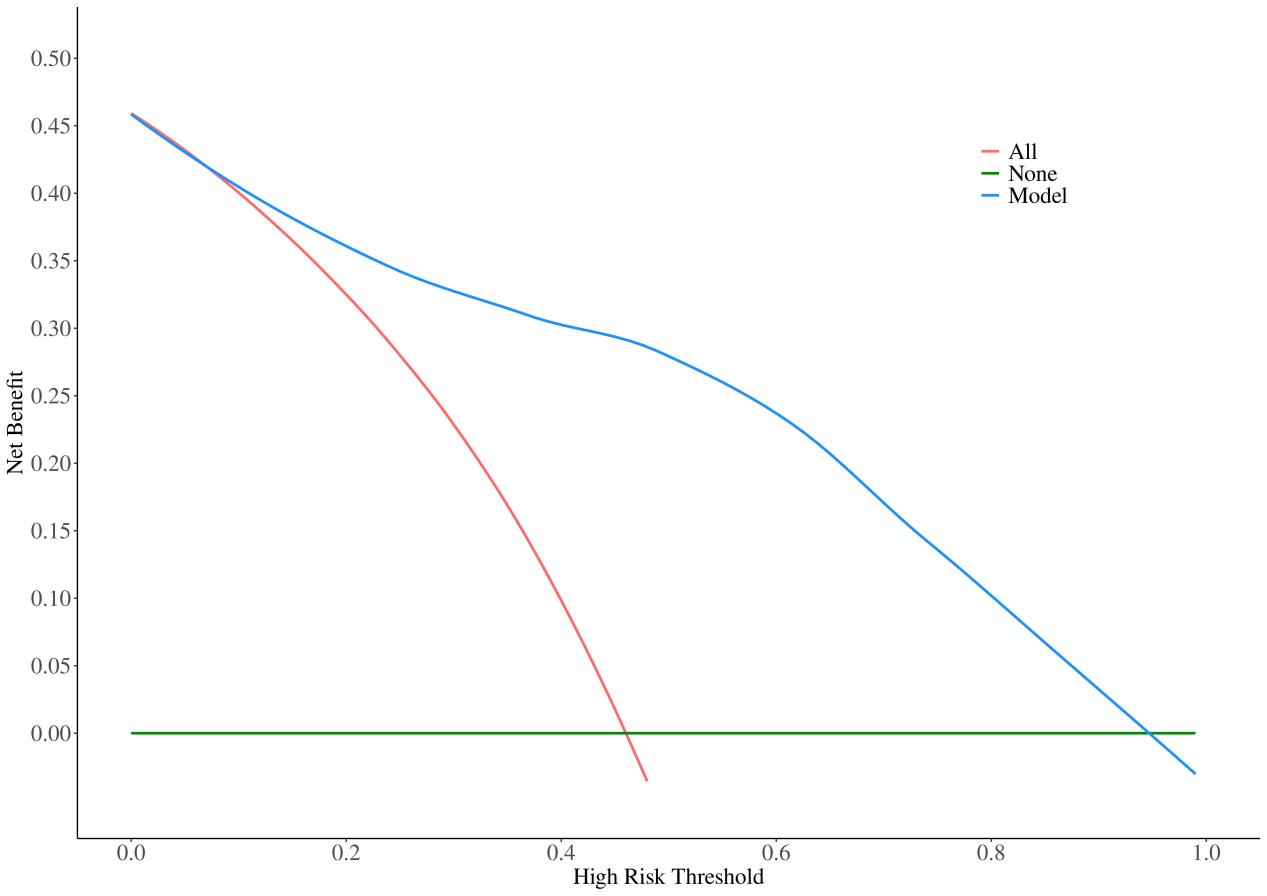


Supplemental Figure 1 Decision curve analysis (DCA) curves.


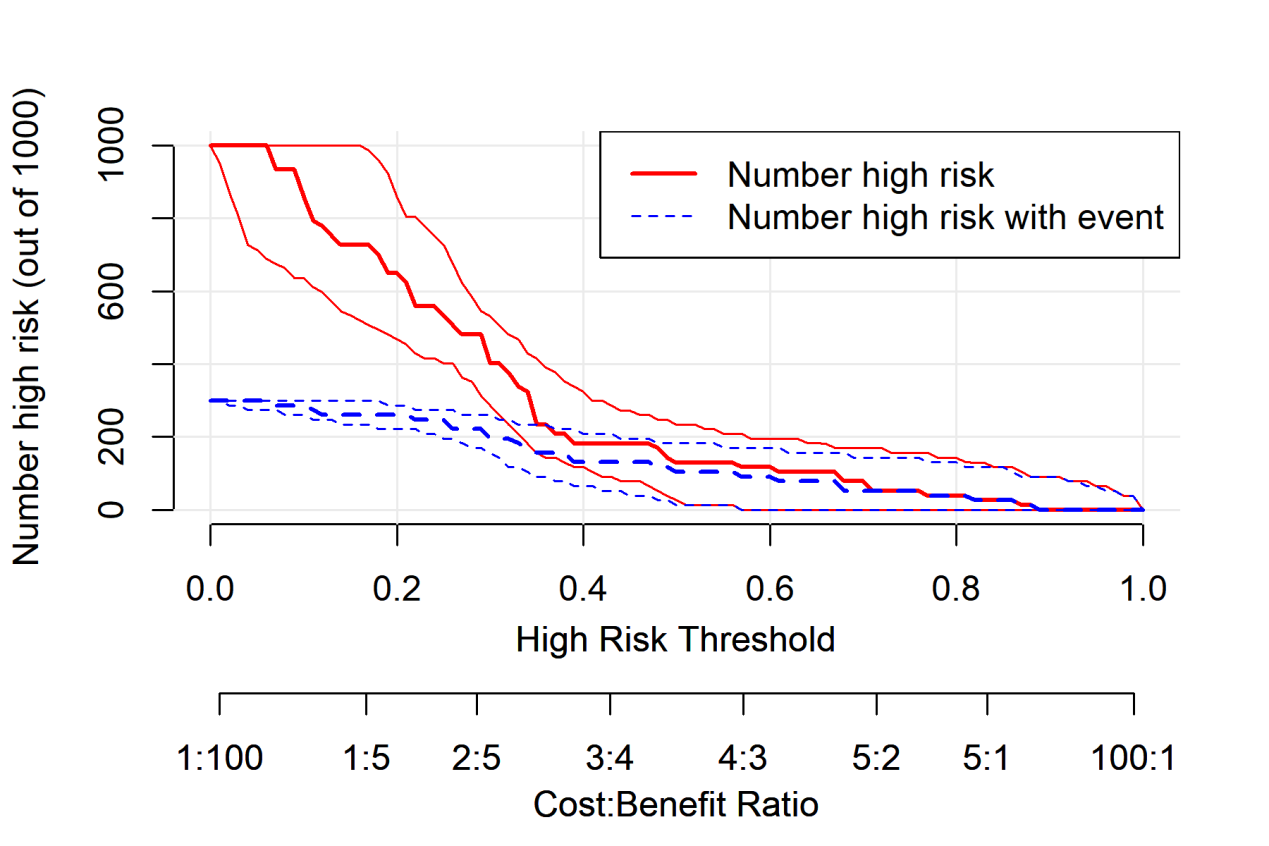


Supplemental Figure 2A, Clinical Impact Curve of ΔPVR.


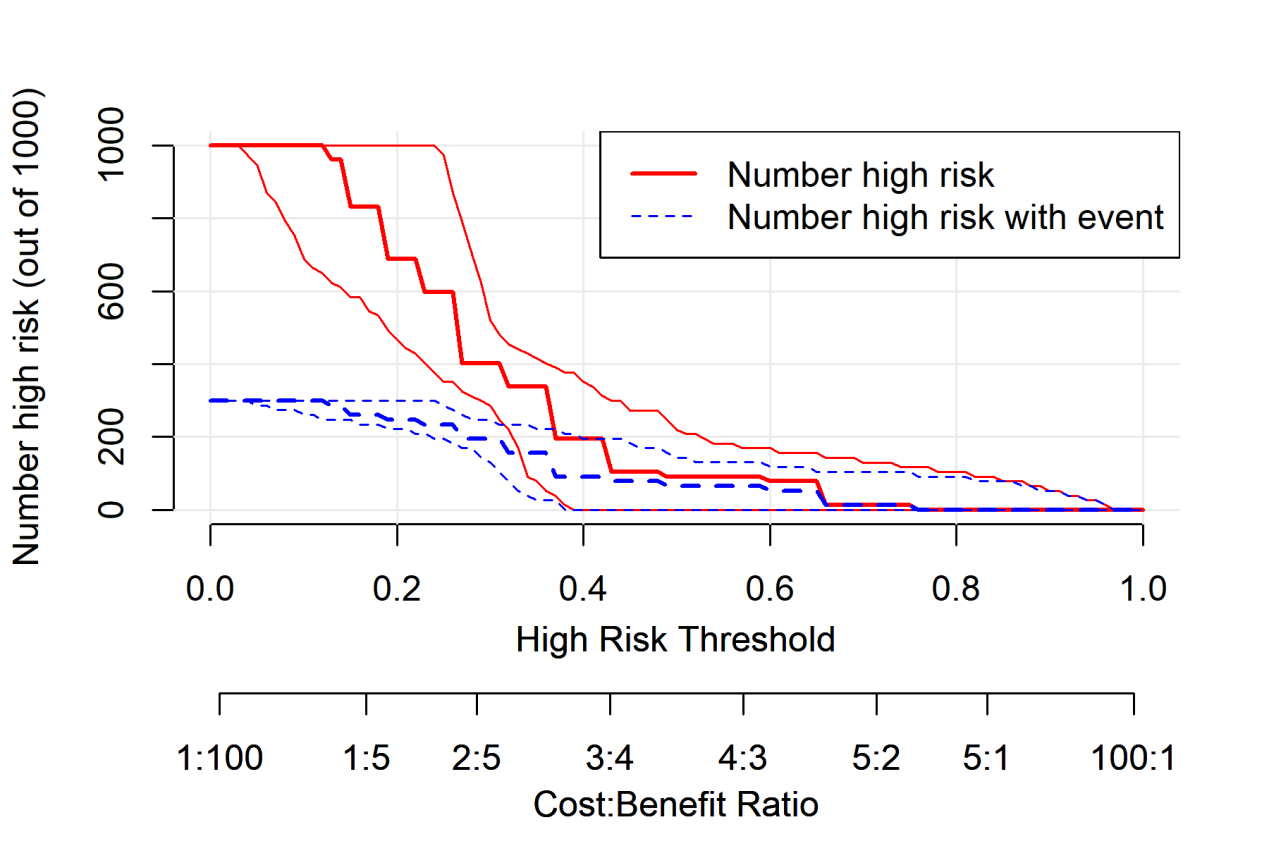


Supplemental Figure 2B, Clinical Impact Curve of IVC-peak.


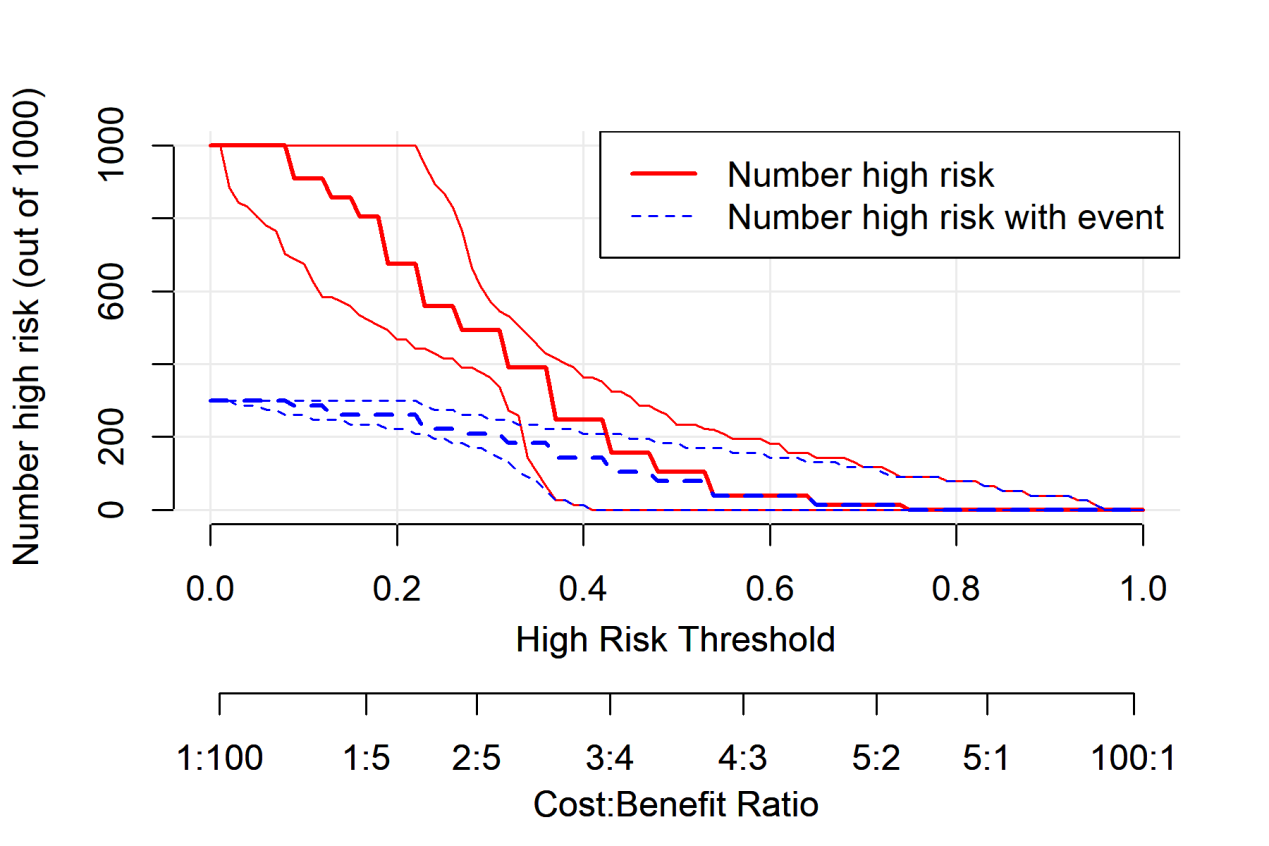


Supplemental Figure 2C, Clinical Impact Curve of ΔTV s′.
